# Supplementary material for: Two- and three-dimensional lanthanide-based coordination polymers assembled by the synergistic effect of various lanthanide radii and flexibility of a new binicotinate-containing ligand: in situ synthesis, structures, and properties
Source: Royal Society of Chemistry journal article supplement (doi:10.1039/c4ra12714e), 2014-11-28
Supplement: c4ra12714e1.pdf [file c4ra12714e1.pdf]

## Supporting Information

### **Two- and Three-Dimensional Lanthanide-Based Coordination Polymers Assembled by the Synergistic Effect of Various Lanthanide Radii and Flexibility of a New Binicotinate-Containing Ligand: in Situ Synthesis, Structures, and Properties**

Baoming Ji,<sup>a</sup> Dongsheng Deng,<sup>a</sup> Junying Ma,<sup>b</sup> Chaowei Sun,<sup>a,b</sup> Bin Zhao<sup>c\*</sup>

<sup>a</sup> *College of Chemistry and Chemical Engineering, Luoyang Normal University, Luoyang, 471022, P. R. China*

<sup>b</sup> *College of Chemical Engineering and Pharmaceutics, Henan University of Science and Technology, Luoyang  
471003, China*

<sup>c</sup> *College of Chemistry and Chemical Engineering, Nankai University, Tianjin 300387, P. R. China*

### The IR data

Polymer **[La(hbptcH)(H<sub>2</sub>O)]<sub>n</sub> (1)**: IR (KBr, cm<sup>-1</sup>): 3489-3074(b), 1565(s), 1533(s), 1483(m), 1408(m), 1365(s), 1317(s), 1276(S), 1253(S), 1172(m), 1096(m), 994(m), 941(w), 870(s), 830(s), 807(s), 725(s), 686(S).

Polymer **[Ce(hbptcH)(H<sub>2</sub>O)]<sub>n</sub> (2)**: IR (KBr, cm<sup>-1</sup>): 3488-3072(b), 1566(s), 1533(s), 1483(m), 1409(m), 1366(s), 1317(s), 1275(S), 1254(S), 1171(m), 1097(m), 995(m), 940(w), 870(s), 831(s), 807(s), 726(s), 686(S).

Polymer **[Pr(hbptcH)(H<sub>2</sub>O)]<sub>n</sub> (3)**: IR (KBr, cm<sup>-1</sup>): 3486-3073(b), 1566(s), 1533(s), 1483(m), 1408(m), 1365(s), 1318(s), 1276(S), 1252(S), 1173(m), 1097(m), 995(m), 941(w), 870(s), 830(s), 807(s), 726(s), 686(S).

Polymer **[Eu(hbptcH)(H<sub>2</sub>O)<sub>2</sub>]<sub>n</sub> (4)**: IR (KBr, cm<sup>-1</sup>): 3485-3073(b), 1576(s), 1549(m), 1393(s), 1367(s), 1334(m), 1228(s), 1211(S), 1183(m), 1162(m), 1146(m), 1113(m), 1092(m), 984(w), 918(s), 871(m), 852(s), 804(s), 728(s), 676(S).

Polymer **[Gd(hbptcH)(H<sub>2</sub>O)<sub>2</sub>]<sub>n</sub> (5)**: IR (KBr, cm<sup>-1</sup>): 3483-3063(b), 1577(s), 1550(m), 1391(s), 1369(s), 1335(m), 1230(s), 1213(S), 1185(m), 1147(m), 1112(m), 1093(m), 985(w), 910(s), 872(m), 852(s), 804(s), 727(s), 679(S).

Polymer **[Tb(hbptcH)(H<sub>2</sub>O)<sub>2</sub>]<sub>n</sub> (6)**: IR (KBr, cm<sup>-1</sup>): 3482-3065(b), 1575(s), 1552(m), 1390(s), 1367(s), 1336(m), 1232(s), 1215(S), 1183(m), 1146(m), 1114(m), 1092(m), 986(w), 911(s), 874(m), 853(s), 802(s), 729(s), 678(S).

Polymer **[Dy(hbptcH)(H<sub>2</sub>O)<sub>2</sub>]<sub>n</sub> (7)**: IR (KBr, cm<sup>-1</sup>): 3489-3055(b), 1575(s), 1549(m), 1389(s), 1368(s), 1335(m), 1271(m), 1229(s), 1212(S), 1184(m), 1147(m), 1113(m), 1092(m), 985(w), 912(s), 871(m), 851(s), 804(s), 727(s), 676(S).

Polymer **[Ho(hbptcH)(H<sub>2</sub>O)<sub>2</sub>]<sub>n</sub> (8)**: IR (KBr, cm<sup>-1</sup>): 3489-3053(b), 1576(s), 1552(m), 1387(s), 1369(s), 1337(m), 1272(m), 1228(s), 1211(S), 1183(m), 1146(m), 1112(m), 1092(m), 984(w), 912(s), 873(m), 852(s), 804(s), 728(s), 677(S).

Polymer **[Er(hbptcH)(H<sub>2</sub>O)<sub>2</sub>]<sub>n</sub> (9)**: IR (KBr, cm<sup>-1</sup>): 3490-3051(b), 1577(s), 1552(m), 1390(s), 1369(s), 1335(m), 1274(m), 1230(s), 1213(S), 1185(m), 1148(m), 1112(m), 1093(m), 985(w), 910(s), 872(m), 852(s), 804(s), 727(s), 679(S).

Polymer **[Lu(hbptcH)(H<sub>2</sub>O)<sub>2</sub>]<sub>n</sub> (10)**: IR (KBr, cm<sup>-1</sup>): 3491-3047(b), 1578(s), 1555(m), 1394(s), 1370(s), 1338(m), 1232(s), 1214(S), 1184(m), 1148(m), 1111(m), 1095(m), 990(w),

914(m), 872(m), 852(s), 804(s), 729(s), 682(S).

**Table S1. Geometrical parameters of hydrogen bonds in 1–3<sup>a</sup>**

| Bond            |                | Distance (Å) |          |          |
|-----------------|----------------|--------------|----------|----------|
|                 |                | 1·La         | 2·Ce     | 3·Pr     |
| O(6)–H···O(3)   | O···O distance | 2.460(3)     | 2.459(4) | 2.459(4) |
| hydrogen bond   | O–H···O angle  | 167.3        | 164.7    | 167.5    |
| O(7)–H···O(6)1# | O···O distance | 2.873(3)     | 2.865(4) | 2.864(4) |
| hydrogen bond   | O–H···O angle  | 161.8        | 159.0    | 158.9    |
| O(7)–H···O(5)2# | O···O distance | 3.017(3)     | 3.034(4) | 3.050(4) |
| hydrogen bond   | O–H···O angle  | 150.7        | 168.5    | 169.1    |

<sup>a</sup>Symmetry transformations use to generate equivalent atoms (consistent with the symmetry transformations). (1#):  $x + 1/2, y - 1/2, z + 1$ ; (2#):  $x, -y + 1, z + 1/2$ .

**Table S2. Geometrical parameters of hydrogen bonds in 4 and 5<sup>a</sup>**

| Bond            |                | distance (Å) |          |
|-----------------|----------------|--------------|----------|
|                 |                | 4·Eu         | 5·Gd     |
| O(7)–H···O(1)1# | O···O distance | 2.709(4)     | 2.701(4) |
| hydrogen bond   | O–H···O angle  | 147.3        | 160.7    |
| O(7)–H···O(5)2# | O···O distance | 2.779(5)     | 2.789(5) |
| hydrogen bond   | O–H···O angle  | 138.1        | 159.1    |
| O(8)–H···O(5)3# | O···O distance | 2.778(5)     | 2.785(5) |
| hydrogen bond   | O–H···O angle  | 168.9        | 155.5    |
| O(8)–H···O(6)4# | O···O distance | 2.740(4)     | 2.735(5) |
| hydrogen bond   | O–H···O angle  | 144.0        | 162.7    |

<sup>a</sup>Symmetry transformations use to generate equivalent atoms (consistent with the symmetry transformations). (1#):  $x, y + 2, z + 1/2$ ; (2#):  $x - 1/2, -y + 3/2, z + 1/2$ ; (3#):  $x - 1/2, -y + 3/2, z - 1/2$ ; (4#):  $x - 1/2, y + 1/2, z$ .

**Table S3. Geometrical parameters of hydrogen bonds in 6–10<sup>a</sup>**

| bond            |                | distance (Å) |          |          |          |          |
|-----------------|----------------|--------------|----------|----------|----------|----------|
|                 |                | 6·Tb         | 7·Dy     | 8·Ho     | 9·Er     | 10·Lu    |
| O(4)–H···O(3)1# | O···O distance | 2.711(3)     | 2.709(4) | 2.591(3) | 2.715(3) | 2.725(3) |
| hydrogen bond   | O–H···O angle  | 176.1        | 168.2    | 166.7    | 176.1    | 164.6    |
| O(4)–H···O(1)2# | O···O distance | 2.589(3)     | 2.581(4) | 2.717(3) | 2.577(3) | 2.572(3) |
| hydrogen bond   | O–H···O angle  | 157.8        | 153.7    | 167.5    | 158.9    | 150.6    |

<sup>a</sup>Symmetry transformations use to generate equivalent atoms (consistent with the symmetry transformations). (1#):  $-x, -y, -z + 1$ ; (2#):  $x - 1/2, -y + 1/2, -z + 1$ .

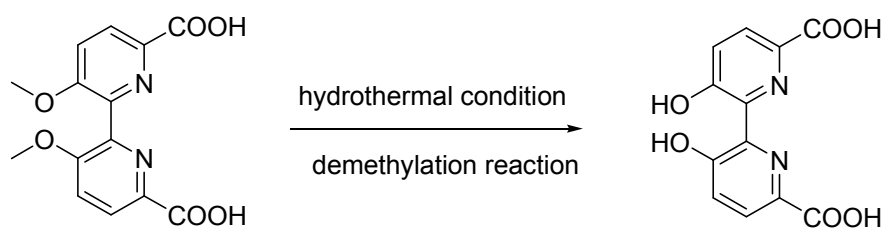

**Scheme S1.** The hbpdcH<sub>4</sub> ligand generated by an in situ ligand transformation reaction of demethylation of the H<sub>2</sub>mbpdc ligand during the hydrothermal reaction

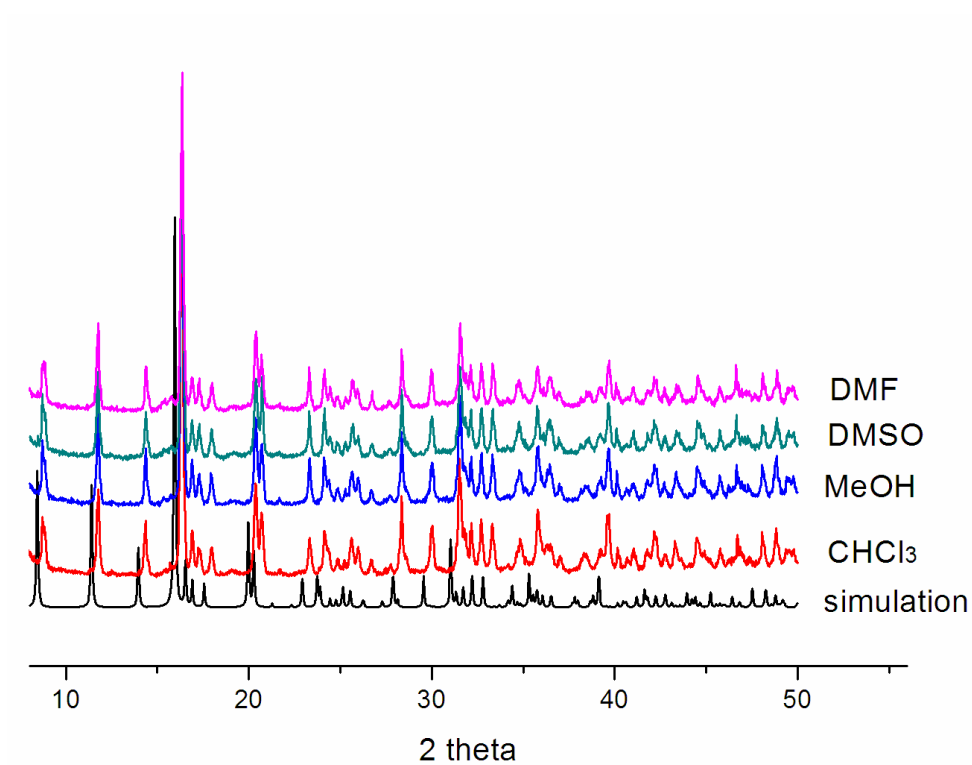

**Figure S1.** Comparison of the experimental powder patterns with the treatment of the different solvents with simulated powder pattern of polymer **10**.

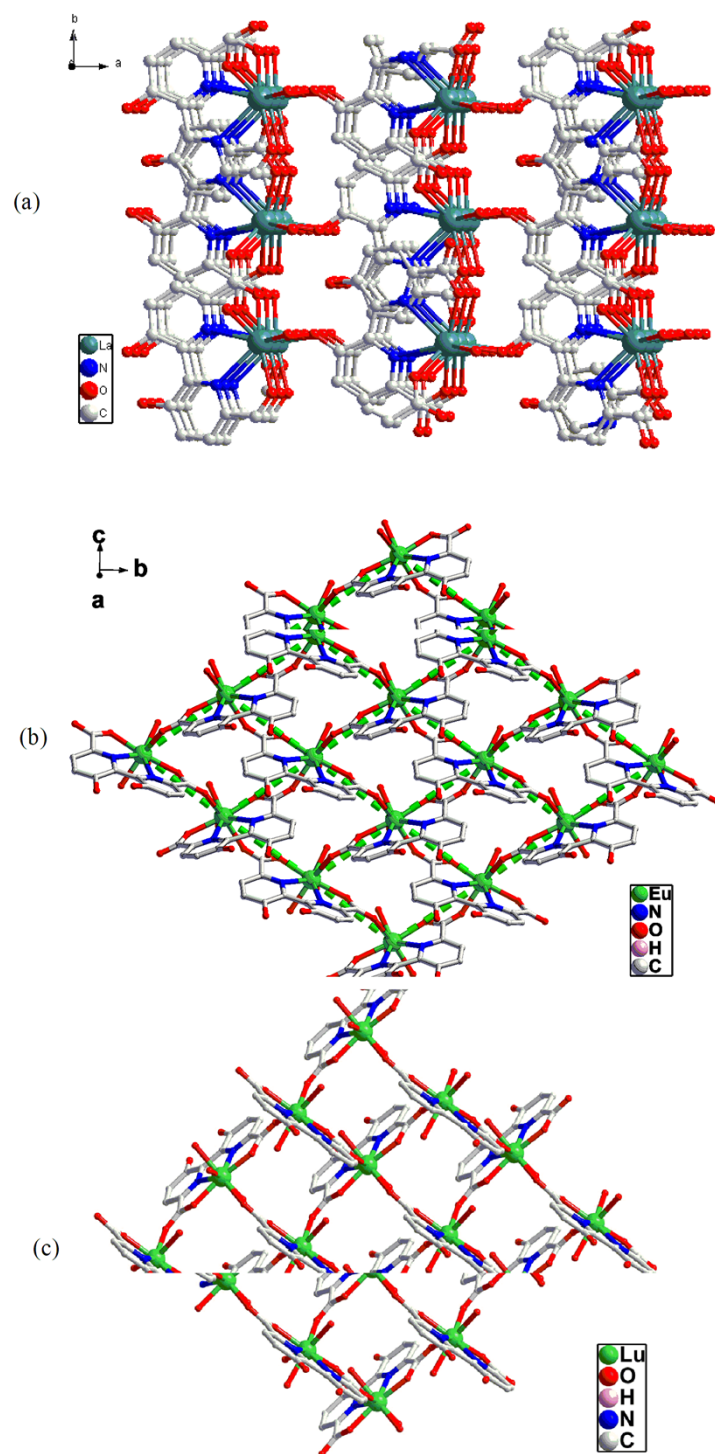

**Figure S2.** Side view of three different structures. (a) 3D structure for **1**. (b) 2D  $4^4$  grid for **4**. (c) 2D  $4^4$  grid for **10**.

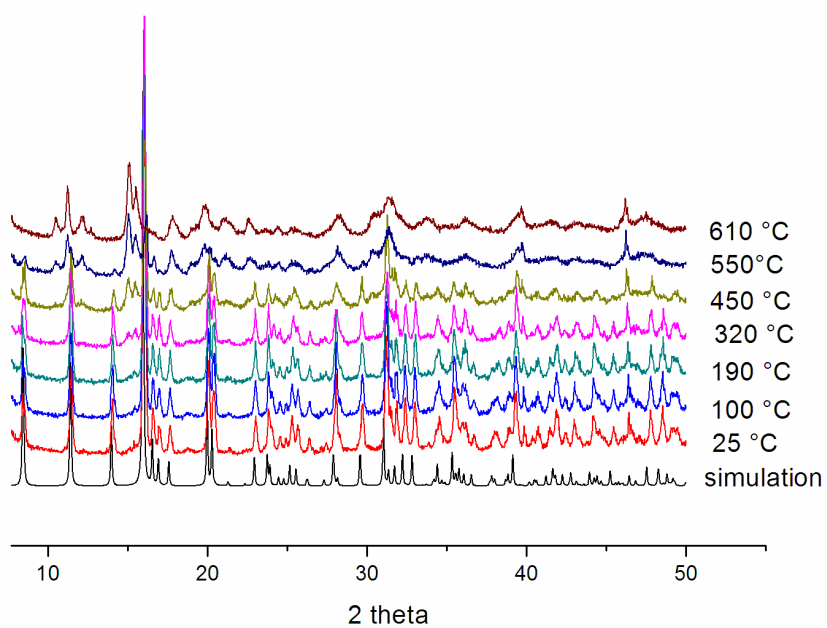

**Figure S3.** Comparison of the experimental powder patterns of the different temperature with simulated powder pattern of polymer **10**.
